# Supplementary material for: Electrochemical and Spectroelectrochemical Studies on the Reactivity of Perimidine–Carbazole–Thiophene Monomers towards the Formation of Multidimensional Macromolecules versus Stable π-Dimeric States
Source: MDPI journal article supplement (doi:10.3390/ma14092167), 2021-04-23
Supplement: s1 [file s1]

# Electrochemical and Spectroelectrochemical Studies on the Reactivity of Perimidine–Carbazole–Thiophene Monomers Towards the Formation of Multidimensional Macromolecules versus Stable $\pi$ -Dimeric States

Malgorzata Czichy <sup>1,\*</sup>, Patryk Janasik <sup>1</sup>, Pawel Wagner <sup>2</sup>, David L. Officer <sup>2</sup> and Mieczyslaw Lapkowski <sup>1,3</sup>

<sup>1</sup> Faculty of Chemistry, Silesian University of Technology, M. Strzody 9, 44-100 Gliwice, Poland; Patryk.Janasik@polsl.pl (P.J.); Mieczyslaw.Lapkowski@polsl.pl (M.L.)

<sup>2</sup> ARC Centre of Excellence for Electromaterials Science and the Intelligent Polymer Research Institute, University of Wollongong, Wollongong, NSW 2519, Australia; pawel@uow.edu.au (P.W.); david@uow.edu.au (D.L.O.)

<sup>3</sup> Centre of Polymer and Carbon Materials, Polish Academy of Sciences, 34 Curie-Sklodowska Str., 41-819 Zabrze, Poland

\* Correspondence: Malgorzata.Czichy@polsl.pl

**Table S1.** Cartesian coordinates of the optimized structures of perimidine-carbazole monomers, calculated at B3LYP hybrid functional combined with 6-31G(d) basis set.

| 1 |          |          | 2        |   |          | 3        |          |   |          |          |          |
|---|----------|----------|----------|---|----------|----------|----------|---|----------|----------|----------|
| C | -2.30476 | 5.08792  | -2.55706 | C | -2.90784 | 8.49579  | -4.83343 | C | -2.94320 | 8.46374  | -4.80669 |
| C | -1.22811 | 5.84586  | -2.12260 | C | -2.16812 | 9.45530  | -4.15926 | C | -2.20761 | 9.42666  | -4.13279 |
| C | -0.13650 | 5.21946  | -1.52690 | C | -1.24375 | 9.06432  | -3.19408 | C | -1.27743 | 9.03967  | -3.17161 |
| C | -2.31261 | 3.69896  | -2.40660 | C | -2.74028 | 7.13614  | -4.55926 | C | -2.76550 | 7.10457  | -4.53639 |
| C | -1.22147 | 2.99819  | -1.80319 | C | -1.80694 | 6.67235  | -3.57967 | C | -1.82575 | 6.64479  | -3.56111 |
| C | 0.95775  | 5.97998  | -1.08416 | C | -0.49091 | 10.02995 | -2.50666 | C | -0.52851 | 10.00871 | -2.48466 |
| C | 2.05142  | 5.35169  | -0.48731 | C | 0.43513  | 9.63757  | -1.53942 | C | 0.40347  | 9.62028  | -1.52152 |
| C | 2.05915  | 3.96571  | -0.32947 | C | 0.61435  | 8.28400  | -1.25368 | C | 0.59246  | 8.26730  | -1.23938 |
| C | 0.97119  | 3.20322  | -0.76895 | C | -0.13344 | 7.31770  | -1.93578 | C | -0.15134 | 7.29766  | -1.92111 |
| C | -0.03140 | 1.06691  | -1.01364 | C | -0.64494 | 5.02564  | -2.27286 | C | -0.64764 | 5.00295  | -2.26282 |
| C | -2.17265 | 0.71123  | -2.01434 | C | -2.25776 | 4.24321  | -3.85392 | C | -2.25876 | 4.21297  | -3.84170 |
| C | -2.05564 | -0.68015 | -1.80301 | C | -1.99625 | 2.90680  | -3.48014 | C | -1.98414 | 2.87724  | -3.47438 |
| C | 0.10967  | -0.32172 | -0.78841 | C | -0.36549 | 3.69684  | -1.87904 | C | -0.35603 | 3.67513  | -1.87479 |
| C | -0.91022 | -1.20160 | -1.17808 | C | -1.04968 | 2.63016  | -2.47922 | C | -1.03196 | 2.60466  | -2.47763 |
| C | -3.07269 | -1.56530 | -2.21710 | C | -2.66890 | 1.83418  | -4.10183 | C | -2.64859 | 1.80132  | -4.09906 |
| C | -2.94291 | -2.93616 | -2.02488 | C | -2.39407 | 0.51947  | -3.74250 | C | -2.35945 | 0.48754  | -3.74760 |
| C | -1.81097 | -3.45478 | -1.40527 | C | -1.45965 | 0.24301  | -2.75026 | C | -1.41869 | 0.21503  | -2.76020 |
| C | -0.78319 | -2.60494 | -0.95143 | C | -0.78383 | 1.28475  | -2.08491 | C | -0.75137 | 1.25973  | -2.09099 |
| C | 0.38418  | -3.11029 | -0.31512 | C | 0.17532  | 1.02826  | -1.06665 | C | 0.21412  | 1.00781  | -1.07723 |
| C | 1.39781  | -2.21313 | 0.04338  | C | 0.86270  | 2.10888  | -0.50069 | C | 0.89109  | 2.09319  | -0.50744 |
| C | 1.26612  | -0.84776 | -0.18191 | C | 0.59832  | 3.41652  | -0.89170 | C | 0.61271  | 3.39975  | -0.89125 |
| N | -1.16295 | 1.60437  | -1.62038 | N | -1.58802 | 5.32148  | -3.25297 | N | -1.59586 | 5.29459  | -3.23908 |
| N | 0.98634  | 1.87070  | -0.61299 | N | 0.04413  | 6.01796  | -1.65411 | N | 0.03605  | 5.99853  | -1.64333 |
| N | 0.57282  | -4.51305 | -0.00828 | N | 0.46631  | -0.30163 | -0.57299 | N | 0.52488  | -0.32144 | -0.59300 |
| O | -3.18762 | 1.10162  | -2.55758 | O | -3.08879 | 4.41850  | -4.72362 | O | -3.09399 | 4.38459  | -4.70808 |
| C | -0.26521 | -5.34529 | 0.67237  | C | -0.41173 | -1.23348 | -0.10614 | C | -0.33698 | -1.27177 | -0.13261 |
| C | 0.28142  | -6.61003 | 0.78368  | C | 0.25142  | -2.37178 | 0.30330  | C | 0.34618  | -2.40156 | 0.26805  |
| C | 1.50693  | -6.56344 | 0.16400  | C | 1.59093  | -2.13982 | 0.09886  | C | 1.68136  | -2.14517 | 0.06531  |
| C | 1.66471  | -5.27162 | -0.30050 | C | 1.69483  | -0.86821 | -0.42512 | C | 1.76305  | -0.86852 | -0.44992 |
| C | 2.82397  | -4.89889 | -0.99353 | C | 2.94429  | -0.33237 | -0.75198 | C | 3.00326  | -0.30949 | -0.77386 |
| C | 3.82274  | -5.86942 | -1.18961 | C | 4.08829  | -1.11597 | -0.52051 | C | 4.16058  | -1.07429 | -0.54712 |
| C | 3.65382  | -7.18267 | -0.70294 | C | 3.98371  | -2.42157 | 0.02741  | C | 4.07888  | -2.38466 | -0.00711 |
| C | 2.48230  | -7.54303 | -0.01671 | C | 2.70601  | -2.93936 | 0.34027  | C | 2.81032  | -2.92687 | 0.30162  |
| C | -0.37585 | -7.65047 | 1.43874  | C | -0.41667 | -3.47774 | 0.82549  | C | -0.30191 | -3.52309 | 0.78183  |
| C | -1.63004 | -7.37757 | 2.00904  | C | -1.82316 | -3.41495 | 0.94853  | C | -1.70912 | -3.48657 | 0.90536  |
| C | -2.18940 | -6.08576 | 1.92216  | C | -2.50296 | -2.23493 | 0.54773  | C | -2.40999 | -2.31557 | 0.51442  |
| C | -1.50637 | -5.05333 | 1.25536  | C | -1.80144 | -1.13629 | 0.02374  | C | -1.72821 | -1.20021 | -0.00085 |
| H | -3.14984 | 5.58349  | -3.01905 | H | -3.62498 | 8.80887  | -5.58236 | H | -3.66490 | 8.77378  | -5.55248 |
| H | -1.25010 | 6.92156  | -2.25270 | H | -2.31977 | 10.50261 | -4.39309 | H | -2.36695 | 10.47347 | -4.36371 |
| H | -3.20650 | 3.25210  | -2.78676 | H | -3.37772 | 6.51795  | -5.15485 | H | -3.40064 | 6.48337  | -5.13133 |
| H | 0.96697  | 7.05745  | -1.19952 | H | -0.61857 | 11.08533 | -2.71696 | H | -0.66368 | 11.06369 | -2.69224 |
| H | 2.89392  | 5.93967  | -0.14670 | H | 1.01437  | 10.38344 | -1.01056 | H | 0.97981  | 10.36872 | -0.99312 |
| H | 2.91164  | 3.48511  | 0.13486  | H | 1.33483  | 7.98709  | -0.50130 | H | 1.31760  | 7.97342  | -0.49029 |
| C | -0.13337 | 3.80964  | -1.36863 | C | -1.06511 | 7.68651  | -2.90709 | C | -1.08869 | 7.66242  | -2.88841 |

|   |          |          |          |   |          |          |          |   |          |          |          |
|---|----------|----------|----------|---|----------|----------|----------|---|----------|----------|----------|
| H | -3.96976 | -1.20368 | -2.70476 | H | -3.40329 | 2.00502  | -4.87953 | H | -3.38709 | 1.96893  | -4.87357 |
| H | -3.72523 | -3.60365 | -2.36331 | H | -2.90741 | -0.29332 | -4.24045 | H | -2.86634 | -0.32765 | -4.24825 |
| H | -1.75342 | -4.52693 | -1.30108 | H | -1.27088 | -0.79520 | -2.52565 | H | -1.21861 | -0.82242 | -2.54251 |
| H | 2.08068  | -0.20701 | 0.13187  | H | 1.15381  | 4.20773  | -0.40391 | H | 1.16200  | 4.19396  | -0.40130 |
| H | 2.29499  | -2.57271 | 0.53125  | H | 1.59574  | 1.93964  | 0.27795  | H | 1.62828  | 1.92829  | 0.26816  |
| H | -1.94008 | -4.06439 | 1.20653  | H | -2.33828 | -0.24295 | -0.26302 | H | -2.28106 | -0.31429 | -0.28008 |
| H | -3.15141 | -5.88619 | 2.37596  | H | -3.57872 | -2.15997 | 0.64306  | H | -3.48693 | -2.26085 | 0.61052  |
| H | -2.16629 | -8.16174 | 2.52739  | H | 0.14201  | -4.35201 | 1.13227  | H | 0.27239  | -4.38972 | 1.08131  |
| H | 0.06516  | -8.63584 | 1.51459  | H | 3.04648  | 0.65550  | -1.17869 | H | 3.08916  | 0.68245  | -1.19449 |
| H | 2.96185  | -3.89911 | -1.38035 | H | 5.05408  | -0.69875 | -0.77305 | H | 5.11887  | -0.63841 | -0.79667 |
| H | 4.72816  | -5.60695 | -1.72121 | H | 2.58340  | -3.93063 | 0.75762  | H | 2.70514  | -3.92269 | 0.71284  |
| H | 4.43099  | -7.91886 | -0.86180 | C | -2.58163 | -4.56163 | 1.50130  | C | -2.44625 | -4.65202 | 1.44768  |
| H | 2.34571  | -8.54945 | 0.35699  | C | 5.19676  | -3.23823 | 0.26909  | C | 5.30664  | -3.17992 | 0.23174  |
|   |          |          |          | C | -3.95825 | -4.61251 | 1.67954  | C | -3.82178 | -4.73091 | 1.62404  |
|   |          |          |          | C | -4.39862 | -5.83090 | 2.22675  | C | -4.23320 | -5.96585 | 2.15613  |
|   |          |          |          | C | -3.38075 | -6.74612 | 2.48299  | C | -3.20280 | -6.86352 | 2.40989  |
|   |          |          |          | S | -1.93345 | -6.02432 | 2.02325  | S | -1.77039 | -6.10769 | 1.95739  |
|   |          |          |          | C | 5.21691  | -4.52238 | 0.80002  | C | 5.35107  | -4.46579 | 0.75695  |
|   |          |          |          | C | 6.51154  | -5.04966 | 0.91767  | C | 6.65328  | -4.96919 | 0.87716  |
|   |          |          |          | C | 7.52377  | -4.19193 | 0.48286  | C | 7.64754  | -4.08980 | 0.44896  |
|   |          |          |          | S | 6.78461  | -2.77786 | -0.04578 | S | 6.88543  | -2.68722 | -0.07643 |
|   |          |          |          | C | -5.83762 | -6.15939 | 2.52681  | O | -5.52231 | -6.28593 | 2.42847  |
|   |          |          |          | C | 6.74132  | -6.43073 | 1.47343  | C | -6.62775 | -5.50095 | 2.15189  |
|   |          |          |          | C | 8.21527  | -6.83398 | 1.52710  | C | -6.88284 | -5.39839 | 0.64874  |
|   |          |          |          | H | 6.19668  | -7.16438 | 0.84088  | H | -6.50422 | -4.49102 | 2.60020  |
|   |          |          |          | H | 6.32546  | -6.47384 | 2.50311  | H | -7.51656 | -5.97795 | 2.61612  |
|   |          |          |          | H | 8.65487  | -6.82922 | 0.50683  | O | 6.85538  | -6.21790 | 1.37788  |
|   |          |          |          | H | 8.30499  | -7.85847 | 1.94592  | C | 8.00797  | -6.96062 | 1.62144  |
|   |          |          |          | H | 8.78384  | -6.13518 | 2.17723  | C | 9.34021  | -6.28983 | 1.28552  |
|   |          |          |          | C | -6.80855 | -5.03007 | 2.18007  | H | 7.93877  | -7.90351 | 1.03895  |
|   |          |          |          | H | -5.93289 | -6.38700 | 3.61040  | H | 8.02040  | -7.22930 | 2.69888  |
|   |          |          |          | H | -6.12536 | -7.06355 | 1.94830  | H | -7.03067 | -6.41230 | 0.22031  |
|   |          |          |          | H | -6.56490 | -4.11749 | 2.76504  | H | -6.03608 | -4.90705 | 0.12843  |
|   |          |          |          | H | -7.84509 | -5.34213 | 2.42737  | H | -7.79855 | -4.79681 | 0.46875  |
|   |          |          |          | H | -6.75868 | -4.79665 | 1.09502  | H | 9.39907  | -6.05827 | 0.20135  |
|   |          |          |          |   |          |          |          | H | 10.17071 | -6.98533 | 1.52997  |
|   |          |          |          |   |          |          |          | H | 9.47747  | -5.36936 | 1.89107  |

**Table S2.** Shape of frontier orbitals of monomers calculated at B3LYP/6-31G(d)/CPCM(DCM). The isovalue is equal to 0.03 e<sup>-</sup>/au<sup>3</sup> in each case.

|   | LUMO+1 / eV                                                                                  | LUMO / eV                                                                                    | HOMO / eV                                                                                    | HOMO-1 / eV                                                                                    | HOMO-2 / eV                                                                                    |
|---|----------------------------------------------------------------------------------------------|----------------------------------------------------------------------------------------------|----------------------------------------------------------------------------------------------|------------------------------------------------------------------------------------------------|------------------------------------------------------------------------------------------------|
| 1 | 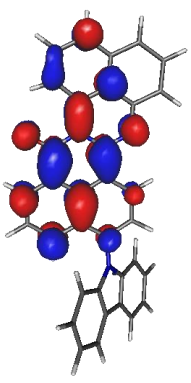<br>-1.32   | <br>-2.68   | <br>-4.85   | <br>-5.54   | <br>-5.79   |
| 2 | <br>-1.44  | <br>-2.81  | <br>-4.40  | <br>-4.48  | <br>-4.94  |
| 3 | <br>-1.43 | <br>-2.80 | <br>-4.25 | <br>-4.33 | <br>-4.93 |

**Table S3.** Spin density of oxidized and reduced form monomers calculated at B3LYP/6-31G(d)/CPCM(DCM), isovalue is equal to 0.005 e<sup>-</sup>/au<sup>3</sup>.

|   | Diradical dianion<br>q=-2 m=3 | Radical anion<br>q=-1 m=2 | Radical cation<br>q=1 m=2 | Diradical dication<br>q=2 m=3 | Triradical trication<br>q=3 m=4 |
|---|-------------------------------|---------------------------|---------------------------|-------------------------------|---------------------------------|
| 1 |                               |                           |                           |                               |                                 |
| 2 |                               |                           |                           |                               |                                 |
| 3 |                               |                           |                           |                               |                                 |

**Table S4.** Shape of frontier orbitals of selected dimers calculated at B3LYP/6-31G(d)/CPCM(DCM). The isovalue is equal to 0.03 e<sup>-</sup>/au<sup>3</sup> in each case.

|                                                                                      |                                                                                     |                                                                                       |
|--------------------------------------------------------------------------------------|-------------------------------------------------------------------------------------|---------------------------------------------------------------------------------------|
| 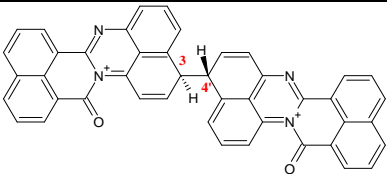    |                                                                                     |                                                                                       |
| <b>LUMO / eV</b>                                                                     |                                                                                     | <b>HOMO / eV</b>                                                                      |
|     |                                                                                     |     |
| <b>-3.94</b>                                                                         |                                                                                     | <b>-6.51</b>                                                                          |
|    |                                                                                     |                                                                                       |
| <b>LUMO / eV</b>                                                                     |                                                                                     | <b>HOMO / eV</b>                                                                      |
|    |                                                                                     |    |
| <b>-3.89</b>                                                                         |                                                                                     | <b>-6.80</b>                                                                          |
|  |                                                                                     |                                                                                       |
| <b>LUMO / eV</b>                                                                     | <b>HOMO / eV</b>                                                                    | <b>HOMO-1 / eV</b>                                                                    |
|   |  |  |
| <b>-3.87</b>                                                                         | <b>-5.73</b>                                                                        | <b>-5.73</b>                                                                          |
|  |                                                                                     |                                                                                       |
| <b>LUMO / eV</b>                                                                     | <b>HOMO / eV</b>                                                                    | <b>HOMO-1 / eV</b>                                                                    |
|   |  |  |
| <b>-2.53</b>                                                                         | <b>-5.08</b>                                                                        | <b>-5.24</b>                                                                          |

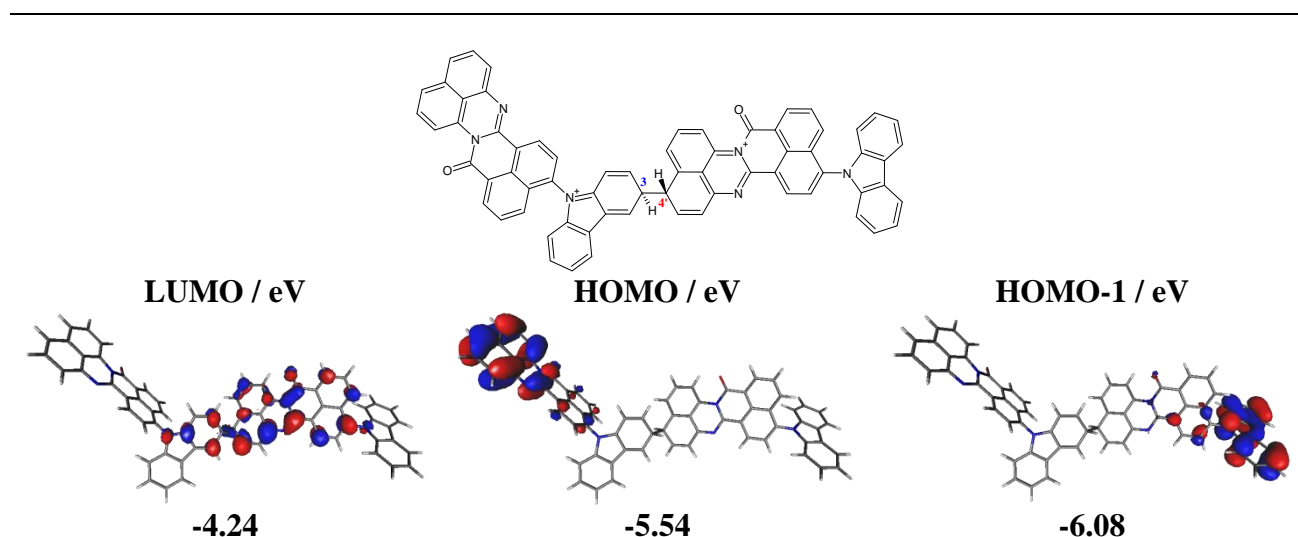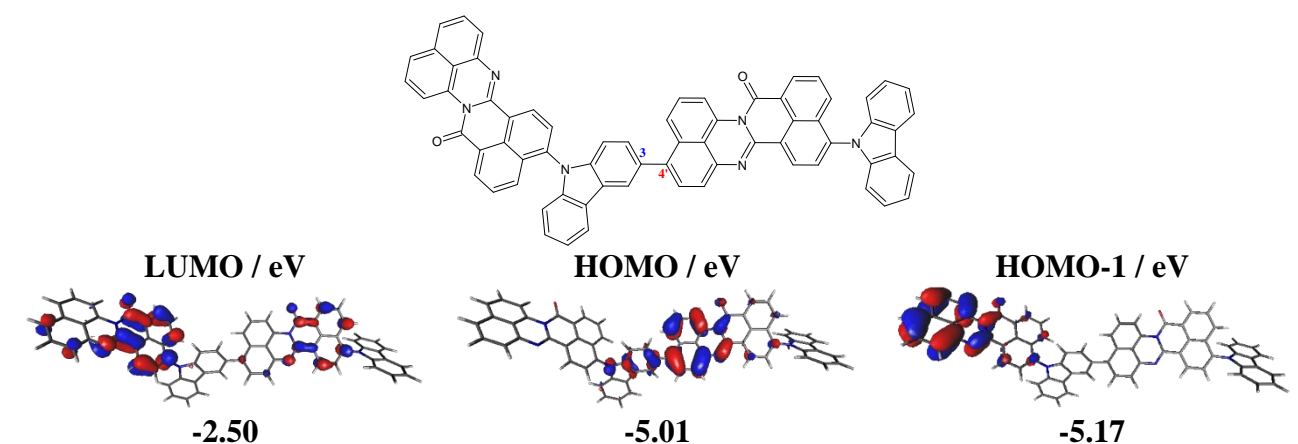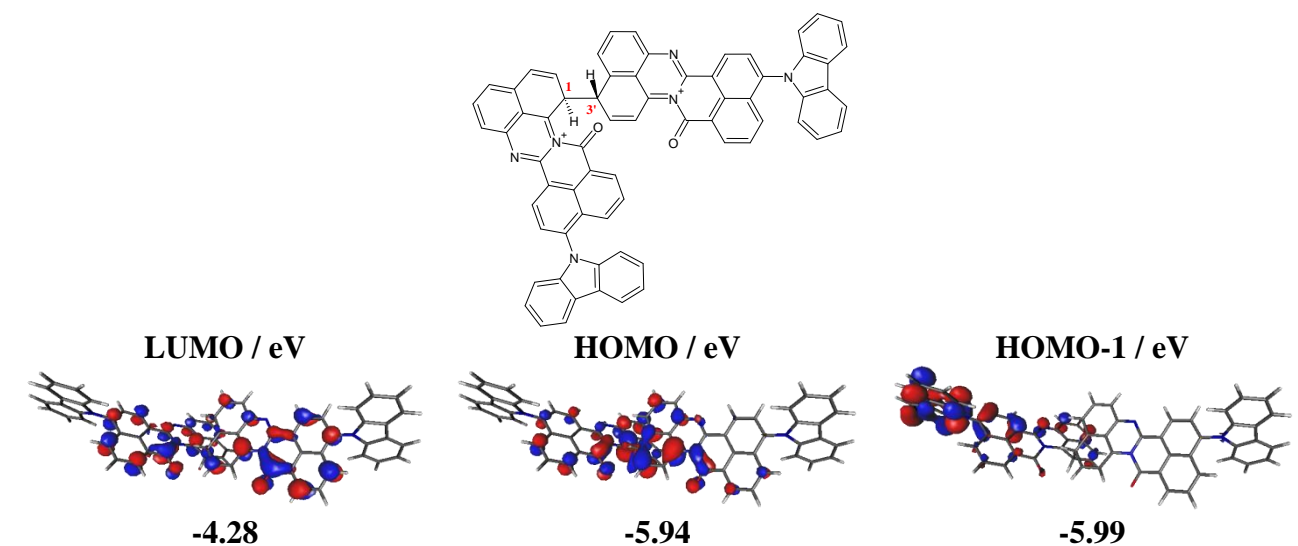

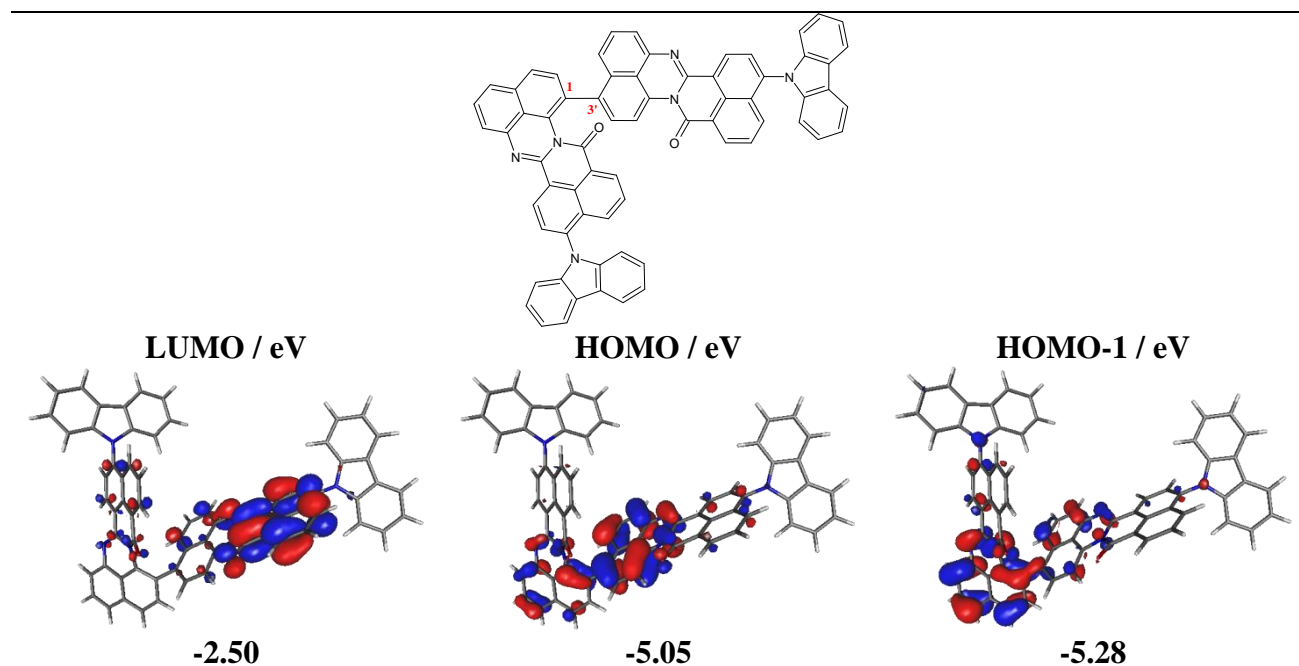

**Table S5.** Summary of electrochemical parameters of monomers in 0.1 M Bu<sub>4</sub>NBF<sub>4</sub>/ DCM, potentials vs Fc|Fc<sup>+</sup>.

| <i>Abbreviation</i> | <b>E<sub>ox1</sub> / V</b> | <b>E<sub>ox2</sub> / V</b> | <b>E<sub>ox3</sub> / V</b> | <b>E<sub>red1</sub> / V</b> | <b>HOMO<sub>electr.</sub> / eV</b> | <b>LUMO<sub>electr.</sub>/eV</b> |
|---------------------|----------------------------|----------------------------|----------------------------|-----------------------------|------------------------------------|----------------------------------|
| <b>1</b>            | +0.62                      |                            | +1.10                      | -1.73                       | -5.61                              | -3.48                            |
| <b>2</b>            | +0.45                      | +0.61                      | +0.81                      | -1.65                       | -5.45                              | -3.57                            |
| <b>3</b>            | +0.36                      |                            | +0.76                      | -1.69                       | -5.34                              | -3.53                            |

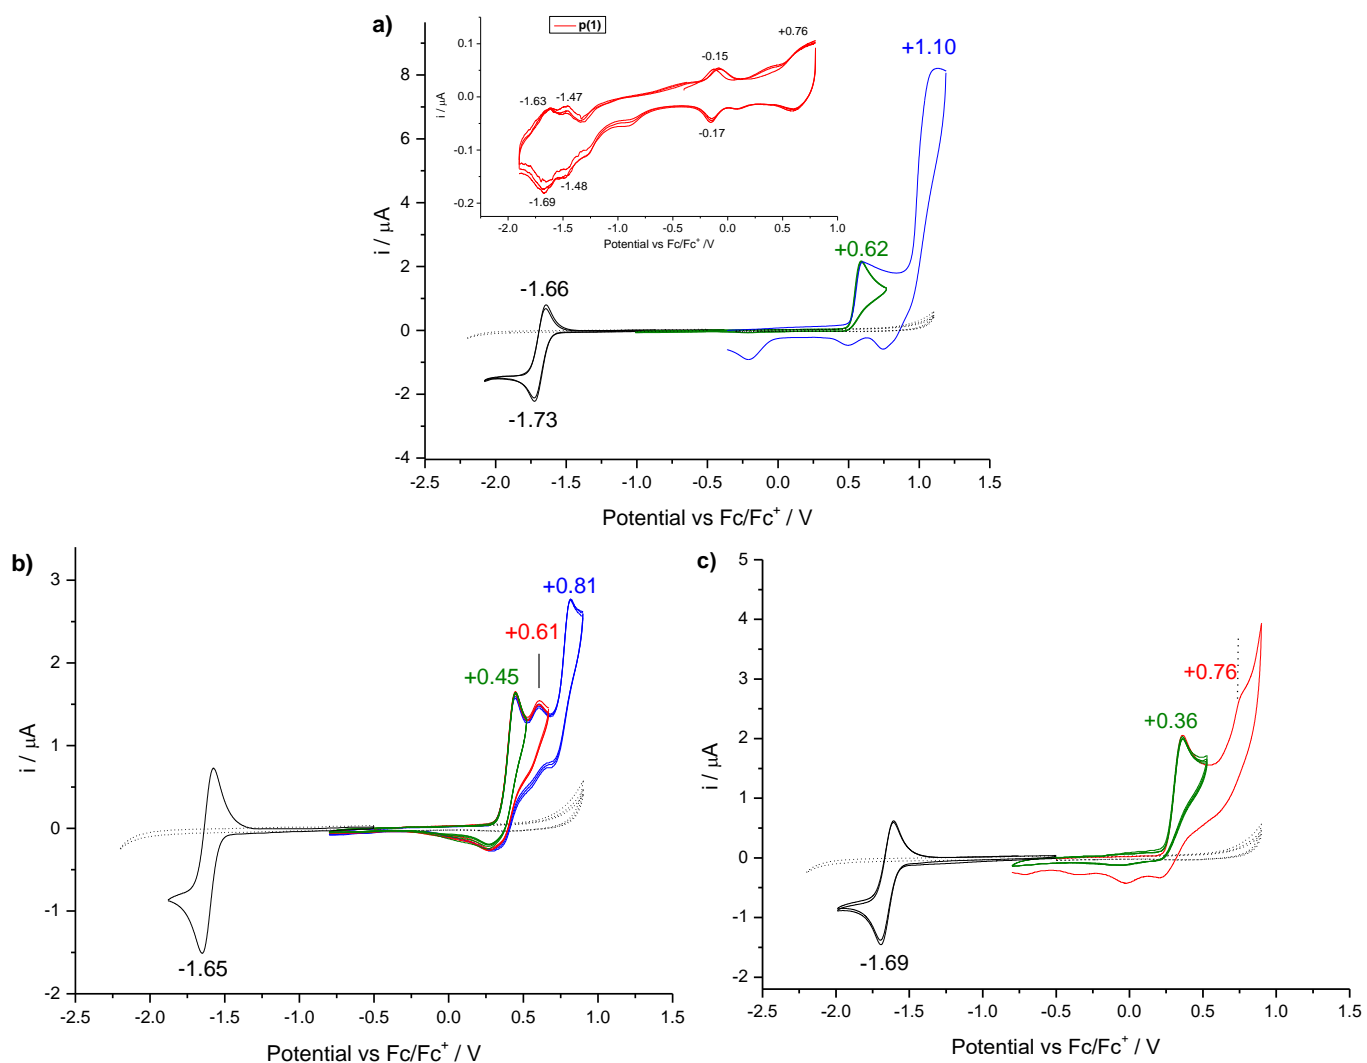

**Figure S1.** CV curves limited by first (green), second (red) and third oxidation (blue) and reduction peaks (black) registered in 1mM solution of **1** (a), **2** (b), **3** (c); in 0.1 M Bu<sub>4</sub>NBF<sub>4</sub>/DCM. **p(1)-I** deposited in the range -0.20–0.87 V while scanning between -1.89 and +0.87 V—(a) insert; 50 mV/s.



**Table S6.** Optimized structures of **1**  $\pi$ -dimers of radical cations (left) and di(radical cations) (right), calculated at  $\omega$ B97X-D functional combined with 6-31G(d,p) basis set.

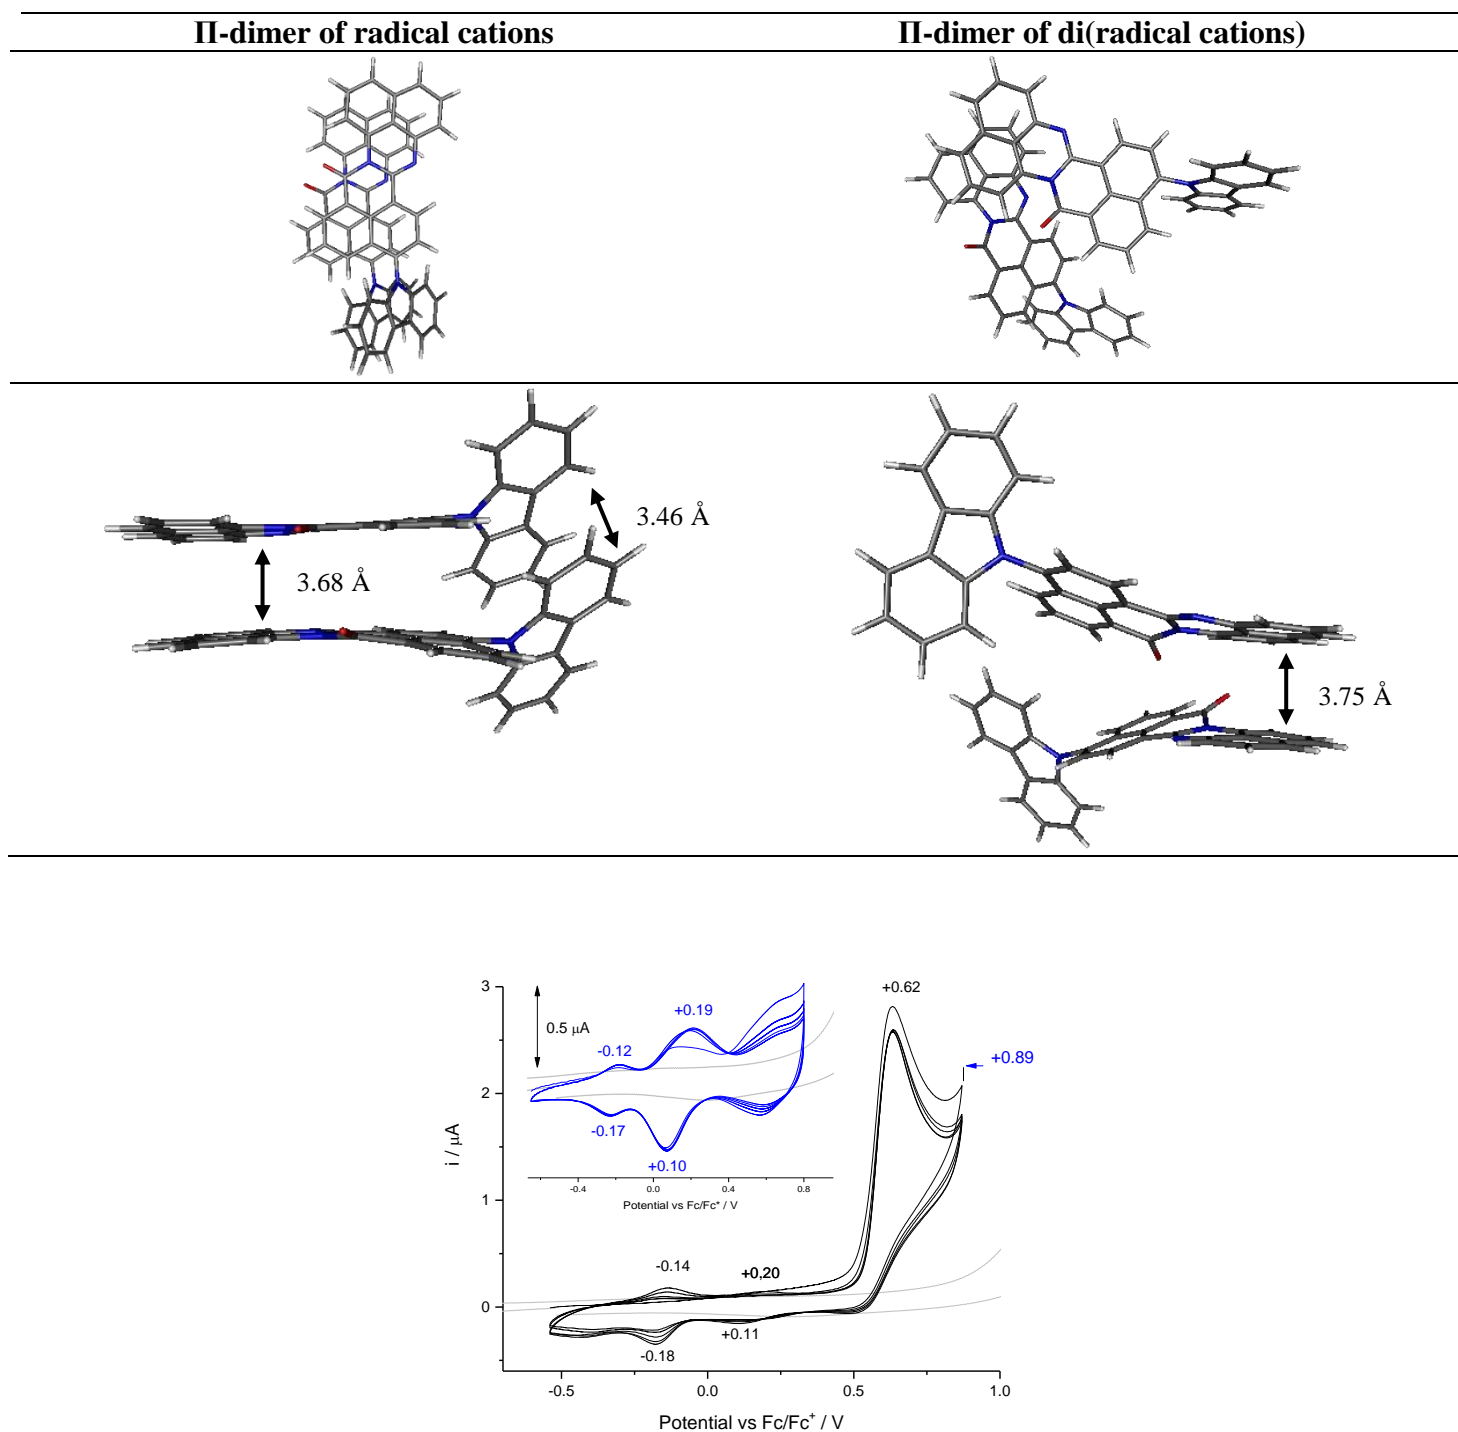

**Figure S2.** CVs limited after first oxidation peaks to +0.89 V in 5 mM of **1** and 0.1 M Bu<sub>4</sub>NBF<sub>4</sub>/DMSO; product under polarization in monomer-free 0.1 M Bu<sub>4</sub>NBF<sub>4</sub>/DMSO (insert); 50 mV/s.

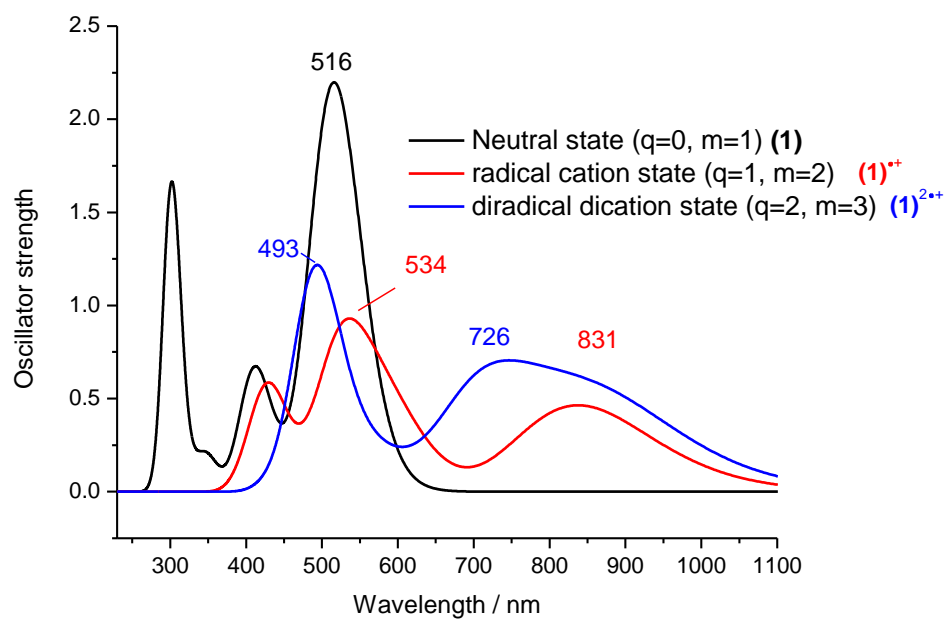

**Figure S3.** Simulated UV-Vis-NIR spectra of **1** states, calculated at TDDFT/CAM-B3LYP/6-31G(d)/CPCM(DCM).

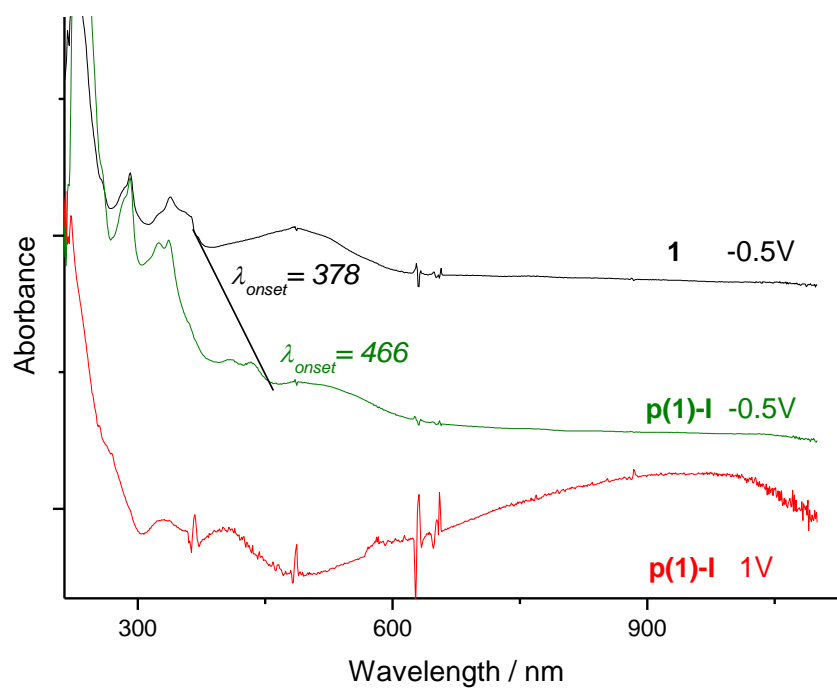

**Figure S4.** UV-Vis-NIR spectrum for neutral monomer **1** (black); neutral **p(1)-II** under  $-0.5$  V polarization (green) ; **p(1)-II** oxidized at  $1$  V (red) in  $0.1$  M  $\text{Bu}_4\text{NBF}_4/\text{DCM}$  solution.

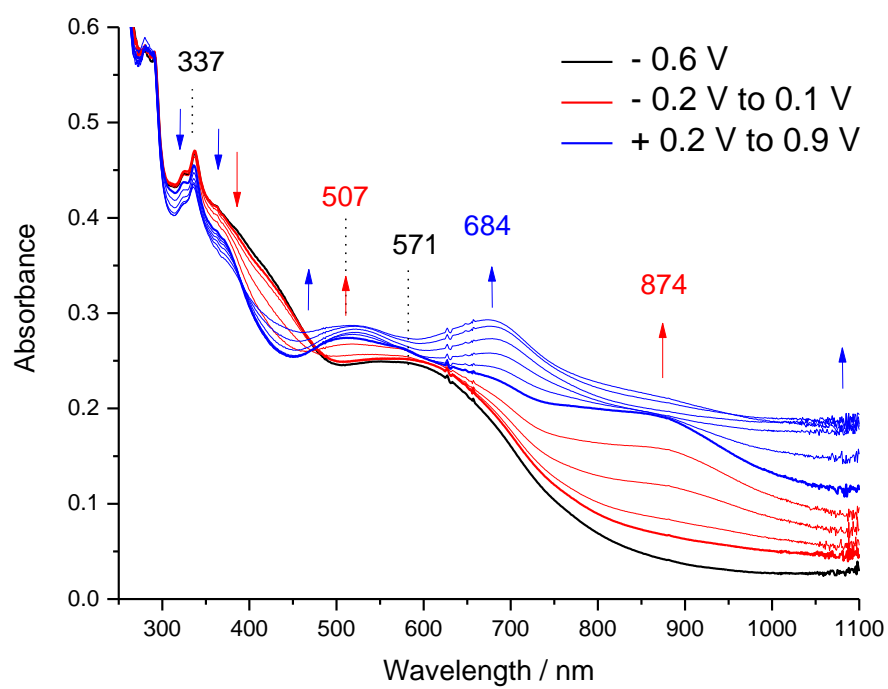

**Figure S5.** Change in absorbance of UV-Vis under polarization of **p(3)** in the range of polaron (*red*) and bipolaron forming (*blue*) in 0.1 M Bu<sub>4</sub>NBF<sub>4</sub>/DCM solution.
